# Supplementary material for: Sequence-dependent nucleosome sliding in rotation-coupled and uncoupled modes revealed by molecular simulations
Source: PLoS Comput Biol. 2017 Dec 1;13(12):e1005880. doi: 10.1371/journal.pcbi.1005880 (PMC5728581; doi:10.1371/journal.pcbi.1005880)
Supplement: S4 Table — The standard unit charges on the flexible tails are excluded. (XLSX) [file pcbi.1005880.s009.xlsx]

## Sheet: Sheet1
Histone	Res ID	Res name	Charge	Histone	Res ID	Res name	Charge
H4	25	ASN	0.01	H4	67	ARG	-0.643
H4	26	ILE	-0.506	H4	68	ASP	0
H4	27	GLN	0.129	H4	70	VAL	-0.344
H4	28	GLY	0.534	H4	71	THR	-0.454
H4	30	THR	0.742	H4	74	GLU	0.424
H4	31	LYS	0.923	H4	75	HIS	0.356
H4	32	PRO	1.683	H4	76	ALA	0.603
H4	35	ARG	0.134	H4	77	LYS	1.24
H4	36	ARG	0.031	H4	78	ARG	0.839
H4	39	ARG	-0.552	H4	79	LYS	0.608
H4	40	ARG	-0.805	H4	80	THR	0.583
H4	44	LYS	0.039	H4	82	THR	0.321
H4	45	ARG	0.81	H4	83	ALA	0.006
H4	46	ILE	0.596	H4	84	MET	0.097
H4	47	SER	1.069	H4	85	ASP	0
H4	48	GLY	1.229	H4	87	VAL	-0.468
H4	49	LEU	0.472	H4	88	TYR	-0.632
H4	51	TYR	-0.268	H4	91	LYS	0.233
H4	52	GLU	-0.188	H4	92	ARG	1.162
H4	53	GLU	-0.043	H4	93	GLN	0.95
H4	55	ARG	-0.672	H4	94	GLY	1.948
H4	56	GLY	0.241	H4	95	ARG	-0.324
H4	57	VAL	-0.426	H4	96	THR	-0.476
H4	59	LYS	-0.607	H4	98	TYR	-0.466
H4	60	VAL	0.045	H4	99	GLY	-0.44
H4	61	PHE	-0.933	H4	100	PHE	0.068
H4	63	GLU	-0.558	H4	101	GLY	0.933
H4	64	ASN	-0.52	H4	102	GLY	1.56
